# Supplementary material for: Yuan-Zhi decoction in the treatment of Alzheimer’s disease: An integrated approach based on chemical profiling, network pharmacology, molecular docking and experimental evaluation
Source: Front Pharmacol. 2022 Aug 24;13:893244. doi: 10.3389/fphar.2022.893244 (PMC9451491; doi:10.3389/fphar.2022.893244)
Supplement: Supplementary file 1 [file Table2.xlsx]

## Sheet: Sheet1
Ingredient Name
1,2,3,6,7-pentamethoxyxanthone
1,3-dihydroxy-4,5-dimethoxyxanthone
1,6-dihydroxy-3,5,7-trimethoxyxanthone
1,6-dihydroxy-3,7-dimethoxyxanthone
1,7-dihydroxy-3-methoxy xanthone
1,7-dimethoxyxanthone
1-carboethoxy-β-carboline
1-hydroxy-3,6,7-trimethoxy xanthone
1-hydroxy-3,7-dimethoxyxanthone
1-peroxyferolide
3,4,5-TRIMETHOXYCINNAMIC ACID
3,4-Dimethoxycinnamic acid
3beta,19alph- dihydroxyursan-28-oic acid
4-c-β-d-glucopyranosyl-1,3,6-trihydroxy-7-methoxyxanthone
4-hydtoxy-2,6,8-trimethyl-6-(3,7-dimethyl-2,6-octadienyl)-2h-1-benzopyran-5,7(3h,6h)-dione
5,6,7-trimethoxycoumarin
6-hydroxy-1,2,3,7-tetramethoxyxanthone
benzoic acid
beta-carboline-1-propionic acid
geraldone
harman
harmine
lancerin
n-acetyl-d-glucosamine
norharman
norhyoscyamine
onjisaponin a
onjisaponin b
onjisaponin c
onjisaponin d
onjisaponin e
onjisaponin f
onjisaponin g
onjixanthone i
perlolyrine
polygalaxanthone iii
polygalaxanthone iv
polygalaxanthone v
polygalaxanthone vi
polygalaxanthone vii
polygaliiol
polygalitol
polygoacetophenoside
s-(2-carboxyethyl)-l-cysteine
sibiricaphenone
sibiricose a1
sibiricose a5
sibiricose a6
sucrose
tenuidine
tenuifolin
tenuifoliose a
tenuifoliose b
tenuifoliose c
tenuifoliose d
tenuifoliose e
tenuifoliose f
tenuifoliose h
tenuifoliose i
tenuifoliose j
tenuifoliose k
tenuifoliose l
tenuifoliose m
tenuifoliose n
tenuifoliose o
tenuifoliose p
tenuifoliside a
tenuifoliside b
tenuifoliside c
tenuifoliside d
tenuiphenone a
tenuiphenone b
tenuiphenone c
tenuiphenone d
tenulin
α-d-(6-o-4-methyl-3,5-dimethoxycinnamoyl)-glucopyranosyl-(1→2)-β-d-(3-o-sinapoyl)-fructofuranose
α-spinasterol
β-carboline-1-carboxylicacid, methyl ester
Ginsenoside-Ra0
Ginsenoside-Ra3
Ginsenoside-Ra1
Ginsenoside-Ra2
6'-Malonylginsenoside Rd1
Malonylginsenoside Rc
Ginsenoside-Rs1
Ginsenoside-Rs2
ginsenoside Rb1
ginsenoside-Rb2
Gypenoside LXIX
ginsenoside-Rc
Malonylginsenoside Rd
Notoginsenoside R6
7-(beta-Xylosyl)cephalomannine
ginsenoside Ro
(2S,3R,4S,5S,6R)-2-[(2S)-2-[(3S,5R,8R,9R,10R,12R,13R,14R,17S)-3-[(2R,3R,4S,5S,6R)-4,5-dihydroxy-6-(hydroxymethyl)-3-[(2S,3R,4S,5S,6R)-3,4,5-trihydroxy-6-(hydroxymethyl)oxan-2-yl]oxyoxan-2-yl]oxy-12-hydroxy-4,4,8,10,14-pentamethyl-2,3,5,6,7,9,11,12,13,15,1
Ginsenoside Re
Araloside A
ginsenoside rf
Sanchinoside C1
20(S)-ginsenoside-Rg2
20(R)-ginsenoside Rg2
20-(S)-Ginsenoside-Rg3
Ginsenoside-Rg3
ginsenoside La
notoginsenoside R2
ginsenoside Rg5
3-O-beta-D-Glucuronopyranosyl gypsogenin
ginsenoside-Rh1
20(S)-Ginsenoside-Rh1
Dauricine (8CI)
ginsenoside rh2
Ginsenoside-Rh4
[(3S,4R,5R)-5-[[(2R,3S,4S,5R,6S)-6-(2-acetyl-5-methoxyphenoxy)-3,4,5-trihydroxyoxan-2-yl]methoxy]-3,4-dihydroxyoxolan-3-yl]methyl 3,4,5-trihydroxybenzoate
(2R,3S,4S,5R,6R)-2-(hydroxymethyl)-6-[[(3S,5R,8R,9R,10R,12R,13R,14R,17S)-12-hydroxy-4,4,8,10,14-pentamethyl-17-[(2Z)-6-methylhepta-2,5-dien-2-yl]-2,3,5,6,7,9,11,12,13,15,16,17-dodecahydro-1H-cyclopenta[a]phenanthren-3-yl]oxy]oxane-3,4,5-triol
20-Hexadecanoylingenol
Chrysanthemaxanthin
alexandrin
Campesteryl ferulate
darutoside
Pandamine
Psuedohypericin
Deoxyharringtonine
Gomisin B
Argininyl-fructosyl-glucose
Adenosine triphosphate
ginsenoside-Rh1_qt
20(S)-Ginsenoside-Rh1_qt
(3S,5R,6S,8R,9R,10R,12R,13R,14R,17S)-17-[(2S)-2-hydroxy-6-methylhept-5-en-2-yl]-4,4,8,10,14-pentamethyl-2,3,5,6,7,9,11,12,13,15,16,17-dodecahydro-1H-cyclopenta[a]phenanthrene-3,6,12-triol
(3S,5R,6S,8R,9R,10R,12R,13R,14R,17S)-17-[(2R)-2-hydroxy-6-methylhept-5-en-2-yl]-4,4,8,10,14-pentamethyl-2,3,5,6,7,9,11,12,13,15,16,17-dodecahydro-1H-cyclopenta[a]phenanthrene-3,6,12-triol
notoginsenoside R2_qt
panaxatriol
Folinic acid
3-O-beta-D-Glucuronopyranosyl gypsogenin_qt
12-O-Nicotinoylisolineolone
7alpha-L-Rhamnosyl-6-methoxylutcolin
20(s)-protopanaxadiol
20-(S)-Ginsenoside-Rg3_qt
6'-Malonylginsenoside Rd1_qt1
Gypnoside V_qt
(3R,5R,8R,9R,10R,12R,13R,14R,17S)-17-[(2S)-2-hydroxy-6-methylhept-5-en-2-yl]-4,4,8,10,14-pentamethyl-2,3,5,6,7,9,11,12,13,15,16,17-dodecahydro-1H-cyclopenta[a]phenanthrene-3,12-diol
(3S,5R,8R,9R,10R,12R,13R,14R,17S)-17-[(2S)-2-hydroxy-6-methylhept-5-en-2-yl]-4,4,8,10,14-pentamethyl-2,3,5,6,7,9,11,12,13,15,16,17-dodecahydro-1H-cyclopenta[a]phenanthrene-3,12-diol
Ginsenoside-Rg3_qt
Malonylginsenoside Rc_qt1
Malonylginsenoside Rd_qt
Panaxadiol
ginsenoside La_qt
Ginsenoside-Rh4_qt
16-Oxoseratenediol
(4aS,6aR,6aS,6bR,8aR,10S,12aR,14bR)-10-hydroxy-2,2,6a,6b,9,9,12a-heptamethyl-1,3,4,5,6,6a,7,8,8a,10,11,12,13,14b-tetradecahydropicene-4a-carboxylic acid
ginsenoside Ro_qt
alpha-Guttiferin
Trifolirhizin
Ginsenoside-Rh3_qt
ginsenoside Rg5_qt
PANGAMIC ACID
malkangunin
Kaempferol-3-arabofuranoside
Dammarane
beta-sitosterol
alexandrin_qt
oleanane
Stigmasterol
Diop
Celabenzine
Methyl tricosanoate
suchilactone
Fumarine
5-heptadec-12-enylresorcinol
Ramalic acid
MAL
Argininyl-fructosyl-glucose_qt
Pancratistatin
methyl (Z)-icos-11-enoate
Nepetin
Stearyl acetate
arachidonate
Suffruticoside A_qt1
Methyl stearate
p-Glucosyloxymandelonitrile
2,6,10,15-tetramethylheptadecane
Ginsenoyne B
METHYL LINOLEATE
Dianthramine
kaempferol
Methyl margarate
Inermin
Malvic acid
Linoleic
Panaxytriol
Ditertbutyl phthalate
DBP
Ginsenoyne C
Aposiopolamine
methyl palmitate
Methyl palmitelaidate
L-Adenosine
Vulgarin
Frutinone A
Girinimbin
Ginsenoyne D
Ginsenoyne A
Ginsenoyne E
n-Heptadecanol
METHYL PENTADECANOATE
palmitic acid
9-HEXADECENOIC ACID
13-Tetradecenyl acetate
panaxynol
5-[(3aS,6R,6aR)-2-keto-1,3,3a,4,6,6a-hexahydrothieno[3,4-d]imidazol-6-yl]valeric acid
Methyl myristate
PENTADECYLIC ACID
cis-Widdrol alpha-epoxide
N-Salicylidene-salicylamine
1-HEXADECYNE
(+)-Maalioxide
(1R,4S,4aR,8aR)-4-isopropyl-1,6-dimethyl-3,4,4a,7,8,8a-hexahydro-2H-naphthalen-1-ol
(1R,4E,7E,11R)-1,5,9,9-tetramethyl-12-oxabicyclo[9.1.0]dodeca-4,7-diene
(Z)-2-methyl-5-[(1S,2R,4R)-2-methyl-3-methylene-2-norbornanyl]pent-2-en-1-ol
3-[[(2S)-2,4-dihydroxy-3,3-dimethylbutanoyl]amino]propanoic acid
Loxanol V
TDA
Mycosinol
5-methyl-tetradecane
MYS
Elemicin
(1S,4E,8E,10R)-4,8,11,11-tetramethylbicyclo[8.1.0]undeca-4,8-diene
3691-11-0
beta-Humulene
beta-caryophyllene
epsilon-Cadinene
δ-elemene
Gamma-Selinene
(Z,Z)-alpha-farnesene
beta-elemene
beta-Selinene
alloaromadedrene
Hepanal
beta-Bisabolene
NN-Dimethyldecanamide
2-METHYLTRIDECANE
tetradecane
7-Tetradecyne
neocnidilide
MAV
L-erythro-isocitric acid
D-erythro-Isocitric acid
Nonacosanediol-6,8
Pisol
2,3,4-Trimethyldecane
2,3,8-Trimethyldecane
4-Methyldodecane
5-Isobutylnonane
Undecane, 3,6-dimethyl
Methylselenocysteine
3,5-Dimethyl-p-anisic acid
GUP
3-methylundecane
2,6-dimethyl-3,7-octadiene-2,6-diol
paeonol
(R)-()-Citronellal
3-Ethyl-3-methylheptane
3,4-Dimethylheptane
Acetal
OCT
3-methylheptane
MLI
2-Formylpyrrole
Neohexane
(&#8722;)-Alloaromadendrene
(-)-alpha-cedrene
()-alpha-Longipinene
(-)-beta-Phellandrene
(-)-Caryophyllene oxide
()-Ledene
()-Terpinen-4-ol
(-)-trans-Carveol
()-Valencene
(1R)-Camphor-10-sulfonic acid
(1R,3aS,4R,6aS)-1,4-bis(3,4-dimethoxyphenyl)-1,3,3a,4,6,6a-hexahydrofuro[4,3-c]furan
(1S,5S)-1-isopropyl-4-methylenebicyclo[3.1.0]hexane
(E)-2-propenoic acid,3-(3-hydroxy-2,6,6-trimethyl-1-cyclohexen-1-yl),methyl ester
(E)-3-(2,4-dimethylphenyl)acrylic acid
(R)-linalool
(Z)-caryophyllene
[(1S)-endo]-(-)-Borneol
2,5-Dimethoxybenzoquinone
2'-O-Methylisoliquiritigenin
3,5,8-trihydroxy-2-(4-hydroxyphenyl)-7-[(2S,3R,4R,5R,6S)-3,4,5-trihydroxy-6-methyl-tetrahydropyran-2-yl]oxy-chromone
8-Isopentenyl-kaempferol
Acoramone
alpha cadinene
alpha-Cubebene
alpha-humulene
Aminacrin
Anizol
apigenin
aristolene
Aristolone
Asaronic acid
Asatone
Astragalin
Azaron
Azulen
beta-asarone
beta-Cubebene
beta-Gurjunene
Bisasarcin
Bisasaricin
BZM
CADINENE
caffeic acid
calacorene
Calamendiol
calarene
CAM
cineole
Cyclite
Cycloartenol
Cymol
D-Camphene
DEP
Diethylbenzylamine
emodin
Epishyobunone
gamma-Asarone
Gazarin
gramenone
Guaiol
HMF
Isocalamendiol
Isocembrol
ISOELEMICIN
Isohomogenol
isopimpinellin
Isoschaftoside
Isoshyobunone
longicyclene
lupeol
Majudin
Marmesin
Methyl isoeugenol
Methyleugenol
MTL
Murolan-3,9(11)-diene-10-peroxy
Myrcene
myristic acid
nicotiflorin
Patchoulene
p-coumaric acid
p-MCA
protocatechuic acid
Rhoifolin
spathulenol
Terragon
thymol
vanillic acid
Veraguensin
WLN: G1R
WLN: Q1R
WLN: VHR
ZINC01081275
ZINC01609418
ZINC01849758
ZINC02040970
α-cubebol
α-gurjunene
α-Panasinsene
δ-cadinene
5-isopropyl-2-methylbicyclo[3.1.0]hex-2-ene
Ammidin
nodakenetin
14-methylhexadecaoic acid methyl ester
4,8,12-trimethyltridecanoic acid methyl ester
6'-Feruloylnodakenin
8-geranoxy-5-methoxypsoralen
Bergaptol-O-β-D-glucopyranoside
anisocoumarin,h
bergaptol
chrysoeriol,7-rutinoside
coumarin,glycoside
Demethylfuropinnarin
diversoside
diversoside_qt
isoimperatorin
marmesinin
notopterol
notoptol
2-(4-hydroxyphenyl)ethyl 4-methoxybenzoate
p-Hydroxyphenethyl trans-ferulate
Phenyethyl 3-methylcaffeate
phenethyl,vanillate
Pterostilbene
cis-Verbenyl acetate
β-cedrene
Decyl acetate
(-)-alpha-Pinene
(-)-nopinene
Acetate C-8
copaene
()-2-Carene
Falcarindiol
Bergaptin
Xanthotoxol
Heriguard
Cnidilin
L-Bornyl acetate
(S)-(+)-alpha-Phellandrene
p-Ocimene
Moslene
Heptan
Exceparl M-OL
Hemo-sol
()-alpha-Terpineol
CHEBI:7
Cumalic acid
Sitogluside
sitosterol
FER
(8S)-8-(2-hydroxypropan-2-yl)-8,9-dihydrofuro[2,3-h]chromen-2-one
Methyl icosanoate
cis-p-Coumarate
Farnesene
nodakenin
12-methyltetradecanoate
APIOL
hexanal
WLN: VH6
OYA
Coniferyl ferulate
Arachic acid
beta-Eudesmol
2-[(1R,3S,4S)-3-isopropenyl-4-methyl-4-vinylcyclohexyl]propan-2-ol
γ-elemene
Scopoletol
dec-2-enal
beta-Chamigrene
()-Borneol
o-Thymol
Tereben
Undekansaeure
caprylic acid
lauric acid
Docosanoate
coumarin
TMH
Melissic acid
O-Methylthymol
Dehydro-p-cymene
delta-amorphene
Carboceric acid
Montanic acid
NONACOSANOIC ACID
PENTACOSANOIC ACID
Ceric acid
lignoceric acid
PENTYLFURAN
β-terpineol
m-Cymol
trans-2,4-decadienal
stearic acid
Terpilene
2-NONANONE
epi-10- .gamma.-Eudesmol
cis-beta-Ocimene
2-[(1R)-2,2,3-trimethyl-1-cyclopent-3-enyl]ethanal
muurolene
(1R,2R,4S)-2,4-diisopropenyl-1-methyl-1-vinylcyclohexane
Daturic acid
Isocaryophyllene
9,17-OCTADECADIENAL (Z)
delta-elemene
NON
TRICOSANOIC ACID
()-Cuparene
cis-Thujopsene
hexanoic acid
β-sesquiphellandrene
(1S,4R,5R)-1-isopropyl-4-methyl-4-bicyclo[3.1.0]hexanol
1,3,8-p-Menthatriene
(2R,4aR)-2-isopropenyl-4a,8-dimethyl-2,3,4,5,6,7-hexahydro-1H-naphthalene
PLO
1H-Cycloprop(e)azulen-7-ol, decahydro-1,1,7-trimethyl-4-methylene-, (1aR-(1aalpha,4aalpha,7beta,7abeta,7balpha))-
himachalene
Skimmetin
Phellopterin
Diosmetin
WLN: QV4
(4S)-1-methyl-4-(6-methylhepta-1,5-dien-2-yl)cyclohexene
nonanoic acid
Prenal
2-Decenal
WLN: QR BVO1R
Tyranton
Prenol
2,6-Dimethyl-1,3,5,7-octatetraene, E,E-
Naphthalene, 1,2,3,4,4a,5,6,8a-octahydro-7-methyl-4-methylene-1-(1-methylethyl)-, (1alpha,4abeta,8aalpha)-
(6S)-1-isopropyl-3-isopropylidene-6-methyl-6-vinylcyclohexene
[(1R,5S)-7,7-dimethyl-4-bicyclo[3.1.1]hept-3-enyl]methyl acetate
heptanoic acid
alpha-Eudesmol
(1R,4aR,8aS)-1-isopropyl-7-methyl-4-methylene-2,3,4a,5,6,8a-hexahydro-1H-naphthalene
Ethol
Marmesine
ANN
Nonadecylic acid
DIMETHYLALLYLUMBELLIFERONE, 0-
Cyclotetradecane
30469-22-8
19435-97-3
Henicosanoic acid
Isohexanol
11Z-hexadecenoic acid
(1S,4R,4aR,8aR)-1-isopropyl-4,7-dimethyl-2,3,4,5,6,8a-hexahydro-1H-naphthalen-4a-ol
Apple oil
2-[(2R,8R,8aS)-8,8a-dimethyl-2,3,4,6,7,8-hexahydro-1H-naphthalen-2-yl]propan-2-ol
NK
KYNA
(2R-cis)-1,2,3,4,4a,5,6,7-Octahydro-alpha,alpha,4a,8-tetramethyl-2-naphthalenemethanol
6-methoxy-2-oxo-2H-chromen-7-yl beta-D-glucopyranoside
Auraptene
PHB
DMEP
2-Hexenol
(2S,4S)-4-methyl-2-(2-methylprop-1-enyl)oxane
2,3,4-Trimethyl-5-phenyloxazolidine
19889-94-2
2-Methylpent-2-en-1-ol
(E)-oct-3-en-1-yne
1,2,3-trimethylcyclohexane
(2S)-heptane-1,2-diol
1,3,4-trimethyl-3-cyclohexene-1-carboxaldehyde
2,5-Dimethylpyrazole
1Ph5SHTetrazol
2-octyldodecan-1-ol
p-Nitrosotoluene
(2R)-1-ethoxypropan-2-ol
Ethyltrimethylethylene
3,3,6,9,9,10-hexamethyl-1-decene
2-methyl-butanol-1-ol
Tiglaldehyde
3,7,1,5-tetramethyl-2-Hexadecen-1-ol
C2H5CH=CHCOOH
2-ethylidene-1,1-dimethyl-cyclopentane
3,7-dimethyl-cyclopenta cyclooctene
3,8-menthadiene
3-methylhexa-2,4-diene
2-Methyl-1-naphthol
3-methyl-6-(1-methylethyl-idene)-cyclohexene
3-METHYLPHENANTHRENE
p-Toluyl chloride
Methyl 5-methylhexanoate
3-Undecyne
(S)-1-Boc-3-methylpiperazine
Methylbenzylamine
1,3-p-Menthadien-7-al
[(2S)-6-methylhept-5-en-2-yl] acetate
Allyloxybenzene
2-Butene, 2-phenyl-, (Z)-
WLN: G1G
m-Ethylacetophenone
DS
Ephedroxane
Ethyl 2-decenoate
Methyl 2-decenoate
carvenone
isobutyric acid
()-N-Methylephedrine
O-benzoyl-L-(+)-pseudoephedrine
Trans-ionone
leucopelargonidin
1,5,8-trimethyl-1,2-dihydro-naphthalene
CLOVENE
Trichloroicosylsilane
1,5-dimethyl-4-(2-hexenyl)benzene
[(1S,4S)-4-isopropyl-1-cyclohex-2-enyl]methanol
patchoulane
1-propenyl-2-vinyl-4-methylcycloheptane
Promyr
Dehydroxylinalool oxide A
Cedreneoxide
p-xylene
[(3R)-3,7-dimethylocta-1,6-dien-3-yl] acetate
19894-97-4
6-Hydroxykynurenate
Nonanal
(L)-alpha-Terpineol
(1R,5R,7S)-4,7-dimethyl-7-(4-methylpent-3-enyl)bicyclo[3.1.1]hept-3-ene
(4S)-4-isopropylcyclohexene-1-carbaldehyde
1,8-cineole
geraniol
(S)-p-Mentha-1,8-dien-7-al
NERYLACETATE
octanol
EIC
Methyl laurate
Oktadekan
Hypnon
Linalool
UPL
Furol
Tetracosane
Dihydro-beta-ionone
Izoforon
FMT
ZINC02169908
Tereton
toluene
(6R)-6-isopropyl-3-methyl-1-cyclohex-2-enone
tricin
Allocymene
p-Cymen-8-ol
1-terpineol
WLN: T5OJ BVO1
7-oxabicyclo-2.2.1-heptane,1-methyl-4-[1-methylethyl]-
BOX
tetramethylpyrazine
1(3H)-Isobenzofuranone, 3-butyl-3a,4,5,6-tetrahydro-, cis-(-)-
cinnamic acid
L-Limonen
3-Hexenol
beta-Ionone
(Z,Z)-farnesol
Sulcatone
Peruviol
farnesol
Isobutyl benzoate
GBL
beta-Citronellol
Nonacosanol
Picein
Piceol
Herbacetin
PCR
6-Methylheptan-2-one
(1R,2R,4R)-Dihydrocarveol
Amylol
Isobutyral
PEY
naphthalene
Heptanol
(E)-oct-2-en-4-one
Pyruvophenone
m-Methylacetophenone
(2R)-2-ethylhexan-1-ol
Cuminol
2-Caren-10-al
2-PENTADECANONE
Resivit
rutin
linolenic acid
acetic acid
Methyl octylate
(E,7S,11R)-3,7,11,15-tetramethylhexadec-2-en-1-ol
delphinidin
2-Ethyl-p-xylene
2,6,10-trimethyl-dodecane
.alpha.-Ionene
Nonacosane
DBF
76897_FLUKA
DIBP
Octacosanol
2,3-dimethyl-1-pentene
Clorius
Azulol
Eciphin
Psi-ephedrin
1-hexanol
(1R,4R)-4-isopropyl-1,6-dimethyltetralin
styrene
(S)-Matsutake alcohol
trans-2-nonenal
Safranal
beta-Cyclocitral
Geranylacetone
Methyl carvacrol
2-Methylpentan-3-one
MIK
EEE
OXA
ZINC02042359
Methyl heptoate
(E)-Pent-2-en-1-ol
Damascenone
Heptadekan
Henicosane
eth
2,6-Dimethylnaphthalene
Farnesylacetone
Tricosane
Tybraine
Usaf cs-6
()-N-Methylpseudoephedrine
alpha-Farnesene
58870_FLUKA
Ethylpalmitate
cuminal
quercetin
(2R)-2-methylbutan-1-ol
n-Triacontanol
cinnamaldehyde
luteolin
Cosmetin
Undecenal
()-Aromadendrene
oleanolic acid
l-carvone
(-)-Epoxycaryophyllene
(+)-catechin
ursolic acid
beta-Bourbonene
Farnesol acetate
oleic acid
l-Menthone
d-isomenthone
LFA
Butylacetat
CYH
()-beta-Pinene
cis-.alpha.-Farnesene
l-Verbenone
49070_FLUKA
HEXACOSANE
Octacosane
phytol
FITONE
Mandenol
Supraene
4H-Benzopyran-4-one, 6-beta-D-glucopyranosyl-5-hydroxy-2-(4-hydroxyphenyl)-7-methoxy-
Piperitenone
24-Ethylcholest-4-en-3-one
poriferast-5-en-3beta-ol
Fleet-X
Pulegone
cis-Piperitol
(4S,6S)-cis-Carveol
Aromadendrene oxide 2
HEPTACOSANE
Rheosmin
()-Neomenthol
(-)-isomenthone
Apocynin
ETHYL FURAN
Syringaldehyde
(2S)-2-myristyloxirane
Acoradiene
l-Carvyl acetate
cis-p-2,8-Menthadien-1-ol
MBP
naringenin
taxifolin
ISOPULEGOL
vitexin
campest-5-en-3beta-ol
DMBQ
Lauric anhydride
eriodictyol
Maslinic acid
(-)-Pulegone
Genkwanin
MIPK
eupatilin
Pectolinarigenin
Tetratriacontane
epi-Afzelechin
Isosafrole
(+)-Leucocyanidin
RNG
MENTHOL
gamma-Terpineol
Hordenine
hesperidin
2-Hexanoylfuran
ZINC02011663
TETRACONTANE
Afzelechin
Vinyl amyl ketone
Luteolin 7-O-glucuronide
mahuannin E
Cathine
Methylbenzylideneacetone
CHD
ST069309
Ethyl palmitelaidate
Truflex OBP
ZINC02140511
1,4-Eicosadiene
Tilianine
1-Ethoxypentane
1,3-Heptadiene, 3-ethyl-2-methyl-
3,5-diformyl-2,4-dihydroxy-6-methylbenzoic acid
(5S)-3,5-dimethylcyclohex-2-en-1-one
EAK
(R)-()-3-Methylcyclopentanone
d-Piperitone
Schizonodiol
Schizonol
d-Dihydrocarvone
rosmarinic acid
()-Menthone
cinerolon
Eriodictiol-7-glucoside
(2S,5R)-2-isopropenyl-5-methyl-1-cyclohexanone
(4aS,6aR,6aS,6bR,8aR,9R,10S,11R,12aR,14bS)-10,11-dihydroxy-2,2,6a,6b,9,12a-hexamethyl-9-methylol-1,3,4,5,6,6a,7,8,8a,10,11,12,13,14b-tetradecahydropicene-4a-carboxylic acid
(1Z,4E,8E)-2,6,6,9-tetramethylcycloundeca-1,4,8-triene
4-[(3R)-3-hydroxybutyl]phenol
(1S,2S,4R)-trans-2-hydroxy-1,8-cineole-B-D-glucopyranoside
(2R,3R)-4-methoxyl-distylin
(3aR,6S,7aR)-6-hydroxy-6-methyl-3-methylene-3a,4,7,7a-tetrahydrobenzofuran-2,5-dione
16844-71-6
1-o-beta-d-glucopyranosyl-8-o-benzoylpaeonisuffrone
1-o-beta-d-glucopyranosyl-8-o-benzoylpaeonisuffrone_qt
1-o-beta-d-glucopyranosylpaeonisuffrone
1-o-beta-d-glucopyranosylpaeonisuffrone_qt
2-(6-carboxy-2,3,4-trihydroxyphenyl)-3,4,5-trihydroxybenzoic acid
2-[(2R,5R,6R)-6,10-dimethylspiro[4.5]dec-9-en-2-yl]propan-2-ol
2-methoxy-5-(e)-propenyl-phenol-beta-vicianoside
2-methoxy-5-[(Z)-prop-1-enyl]phenol
3,4,5-trihydroxybenzoic acid
4,7-DIMETHYLBENZOFURAN
4-ethyl-paeoniflorin
4-ethyl-paeoniflorin_qt
4-o-galloylalbiflorin
4-o-galloylalbiflorin_qt
4-o-methyl-paeoniflorin
4-o-methyl-paeoniflorin_qt
60761-00-4
8-debenzoylpaeonidanin
8-debenzoylpaeonidanin_qt
9-ethyl-neo-paeoniaflorin A
9-ethyl-neo-paeoniaflorin A_qt
Albiflorin
Albiflorin_qt
Amyrin
Antioxidant No. 33
arbutin
baicalein
Baicalin
benzoyl paeoniflorin
butylated hydroxytoluene
Durol
ELD
ellagic acid
Ethyl oleate (NF)
EUG
Eugeniin
eugenol
evofolinB
Friedelin
galloylpaeoniflorin
galloylpaeoniflorine
galloylpaeoniflorine_qt 2
hexadecane
hydroquinone
isobenzoylpaeoniflorin
Lactiflorin
Lactiflorin_qt
Methylgallate
oxypaeoniflorin
oxypaeoniflorin_qt
paeoniflorgenone
Paeoniflorigenone
paeoniflorin
paeoniflorin_qt
paeonin,a
paeonin,a_qt
paeonin,b
paeonin,b_qt
paeonin,c
paeonin,c_qt
paeonioflorin
Paeonolide
pedunculagin
Pentadecanol
Pentagalloylglucose
peonidin
Progallin A
PYG
salicylic acid
Saligenol
Spinasterol
stigmast-7-en-3-ol
trans-.beta.-Terpinyl benzoate
TRD
TWT
WLN: QR BV1
TML
3-Butynol
Zyklohexen
Methyl butenone
m-xylene
Cyclohexylmethanol
2,4-Dimethylhexane
(-)-Methyl 2-methylbutyrate
1,9-Decadiyne
Butylbenzene
(1R)-1-phenylpropan-1-ol
(-)-Comphene
(5S)-1-isopropyl-4-methylbicyclo[3.1.0]hex-3-ene
(R)-(-)-alpha-Phellandrene
Artemisia triene
Car-3-ene
sesamol
3-Methyl-6-(1-methylethyl)-cyclohexene
Dekan
(1S,5R)-7,7-dimethyl-4-bicyclo[3.1.1]hept-3-enecarboxaldehyde
Eucarvone
pinocarvone
methyl salicylate
3,5-Dimethoxytoluene
(1R,3S,5R)-6,6-dimethyl-2-methylene-3-norpinanol
(1S,3R,5S)-6,6-dimethyl-2-methylene-3-norpinanol
(S)-2,2,3-Trimethylcyclopent-3-ene-1-acetaldehyde
[(4R)-4-isopropenyl-1-cyclohexenyl]methanol
2,3-dehydro-1,8-cineole
dl-Thujone
epicamphor
trans-Verbenol
(-)-beta-Fenchol
(+/-)-Isoborneol
(R)-p-Menth-1-en-4-ol
delta-Terpineol
Nerol
trans-p-2-Menthen-1-ol
Octyl formate
Safrol
CYCLODODECANE
DODECENE
linalool oxide B (cis-THF)
Tip-Nip
3,4,5-Trimethoxytoluene
citronellyl formate
DHNQ
4-methoxy-6-[(E)-prop-1-enyl]-1,3-benzodioxole
Croweacin
Myristicin
Sarisan
Carvacryl acetate
Kakoul
Methoxyeugenol
2-[(1R)-4-methyl-1-cyclohex-3-enyl]propan-2-yl acetate
ACETIC ACID,BORNYL ESTER
Neryl acetate
Safynol
(Z)-calamenene
alpha-Curcumene
(1S,4S)-7-isopropylidene-1,4-dimethyl-2,3,4,5,6,8-hexahydro-1H-azulene
(4aR,8aS)-7-isopropylidene-4a-methyl-1-methylenedecalin
58924_FLUKA
alpha-Guaiene
BB_NC-0668
cis-beta-farnesene
Germacrene B
Germacrene D
β-seisquiphellandrene
δ-selinene
(E)-9-Isopropyl-6-methyl-5,9-decadiene-2-one
1-Pentadecyne
Cyclopentadecane
Pentadecene
6892-80-4
Campherenol
patchouli alcohol
T-Cadinol
linalyl isobutyrate
Myristelaidic acid
n-butyl-β-D-fructopyronoside
Dodecatetraenamide, N-(2-methylpropyl)-
Eugenone
OCTADECENE
4,9-dimethoxy-1-vinyl-$b-carboline
(E)-icos-9-ene
Estriol
Caribine
(3S)-7-hydroxy-3-(2,3,4-trimethoxyphenyl)chroman-4-one
1-Asarinine
sesamin
ZINC05223929
[(1S)-3-[(E)-but-2-enyl]-2-methyl-4-oxo-1-cyclopent-2-enyl] (1R,3R)-3-[(E)-3-methoxy-2-methyl-3-oxoprop-1-enyl]-2,2-dimethylcyclopropane-1-carboxylate
Cryptopin
Myricadiol
Sarmentoloside
ACon1_002321
Cynanuriculoside A_qt
Cynanuriculoside A
12-senecioyl-2E,8E,10E-atractylentriol
14-acetyl-12-senecioyl-2E,8E,10E-atractylentriol
14-acetyl-12-senecioyl-2E,8Z,10E-atractylentriol
伪-Longipinene
stigmast-22E-en-3beta-ol
伪-Amyrin
(1R)-2-methyl-1-phenylprop-2-en-1-ol
(3S)-3-[(1R)-1,5-dimethylhex-4-enyl]-6-methylenecyclohexene
(3S,8S,9S,10R,13R,14S,17R)-10,13-dimethyl-17-[(2R,5S)-5-propan-2-yloctan-2-yl]-2,3,4,7,8,9,11,12,14,15,16,17-dodecahydro-1H-cyclopenta[a]phenanthren-3-ol
纬-elemene
Akridin
(1S,2R,4R)-Neoiso-dihydrocarveol
PHA
LPG
atractylenolide i
atractylenolideII
atractylenolide iii
atractylone
juniper camphor
(5E,9Z)-3,6,10-trimethyl-4,7,8,11-tetrahydrocyclodeca[b]furan
3尾-acetoxyatractylone
GLY
Polymannose
Gulutamine
Methose
L-
L-Lysin
DTY
2-[(2R,5S,6S)-6,10-dimethylspiro[4.5]dec-9-en-2-yl]propan-2-ol
uridine
selina-4(14),7(11)-dien-8-one
Prolinum
biatractylolide
ATRACTYLODES MACROCEPHALA
D-Serin
ASI
L-Valin
L-Ile
Ethyl pivaloylacetate
Istidina
8β-ethoxy atractylenolide Ⅲ
